# Supplementary material
Source: PubMed Central journal article supplement (PMC2708710)
Supplement: 0904998106_0904998106SI.pdf [file 0904998106_0904998106SI.pdf]

# Supporting Information

Matrone et al. 10.1073/pnas.0904998106

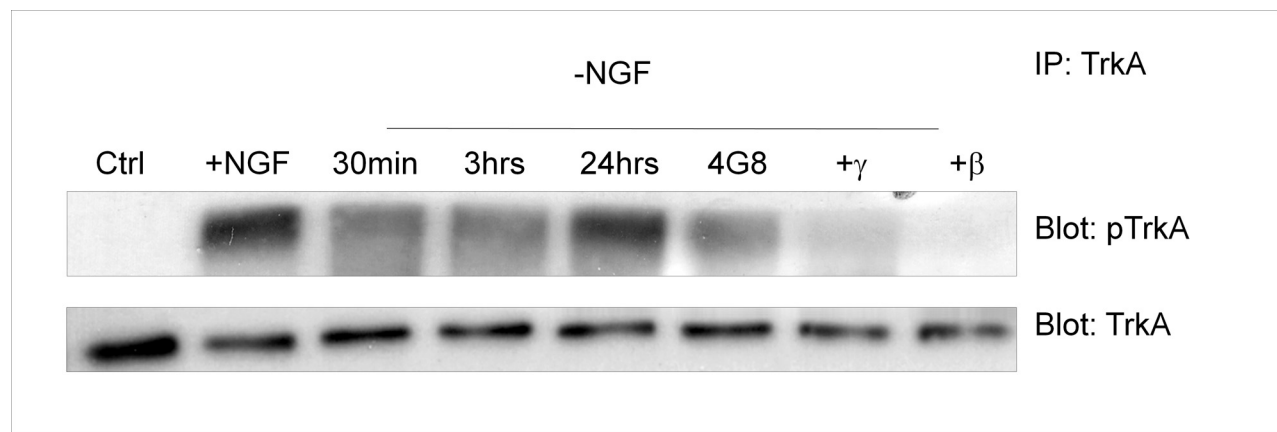

**Fig. S1.** Immunoprecipitation analysis of TrkA performed with a specific anti-TrkA (see *Methods*) followed by immunoblotting with TrkA(pY490) antibodies. Ctrl, hippocampal neurons before NGF exposure; +NGF, hippocampal neurons exposed to NGF; -NGF, hippocampal neurons deprived of NGF in a time ranging from 30 min to 24 h in the presence or not of anti-A $\beta$  antibodies (4G8) or of  $\gamma$  and  $\beta$  secretase inhibitors.

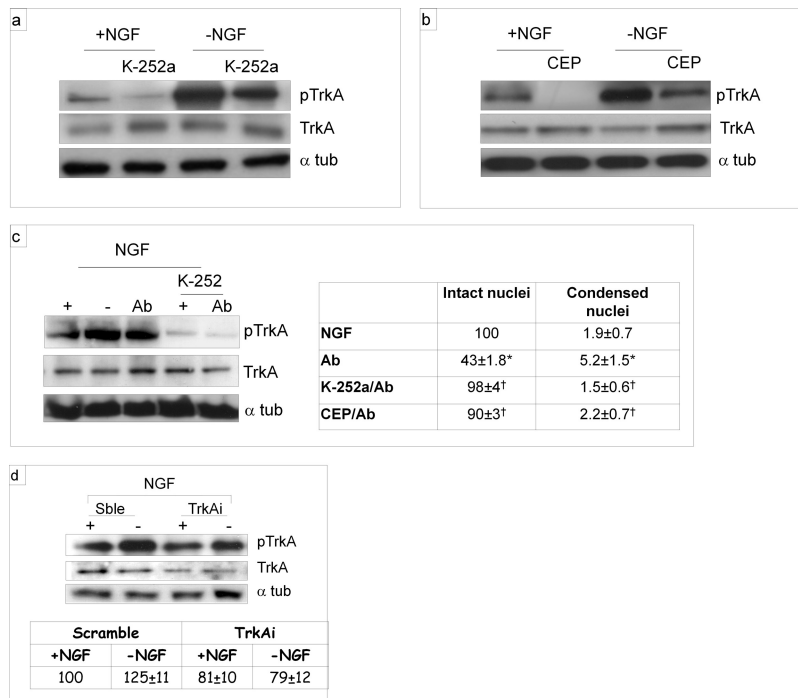

**Fig. S2.** (a and b) Western blot analysis of pTrkA after exposure to K-252a (100 nM) and CEP-2563 (200 nM), in the presence (K-252a; CEP) or not of NGF (K-252a/-NGF; CEP/-NGF). Western blots are representative of 4 different experiments. (c) Western blot of pTrkA in samples exposed to 10  $\mu$ M Abeta 1–42 peptides (Ab) in the presence or absence of K-252a and CEP-2563 (K-252a/Ab; CEP/Ab). The corresponding extents of cell survival (evaluated as number of condensed and intact nuclei) are reported in the *Table*. Condensed nuclei are expressed as the mean  $\pm$  SE of 10 fields of duplicate determinations of 5 independent experiments. Intact nuclei are reported as percentage of controls (+NGF). \* $P < 0.05$  vs. cell survival of +NGF samples; † $P < 0.05$  vs. cell survival of -NGF or Abeta samples. (d) Western blot analysis of TrkA receptor extent after neuronal silencing (TrkAi) and of the corresponding scramble samples (Sble) in the presence (+NGF) or not (-NGF) of NGF. Western blots are representative of 4 different experiments. Optical density analysis is reported in the *Table*.

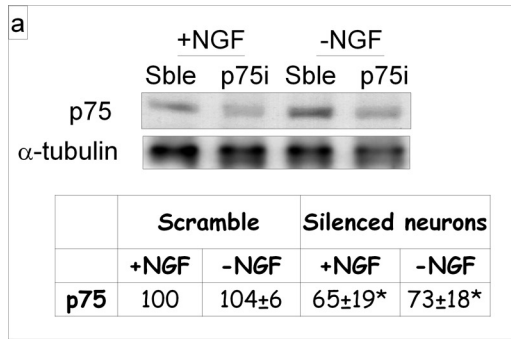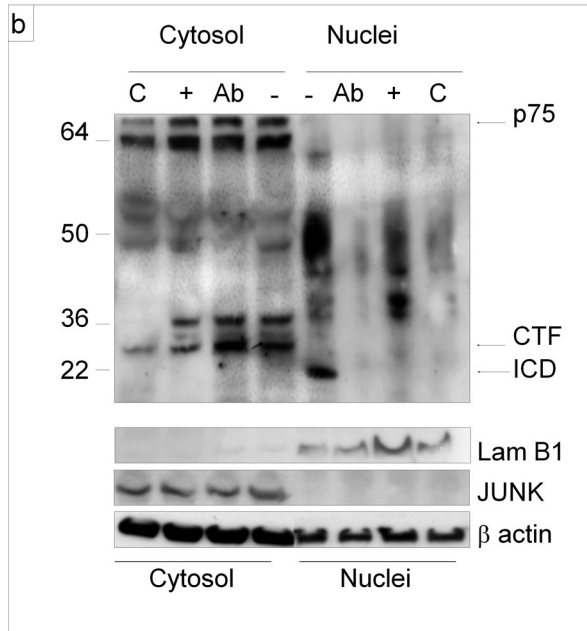

**Fig. S3.** (a) Western blot analysis of p75 receptor extent after neuronal silencing (p75i) and of the corresponding scramble samples (Sble) in the presence (+NGF) or not (-NGF) of NGF. Western blots are representative of 5 different experiments. Optical density analysis is reported in the *Table*. (b) Cytosolic and nuclear fractions Western blot analysis performed with p75 C-terminus antibody (see *Methods*) after Abeta 1–42 (Ab) exposure (see *Methods*). C, neurons before NGF exposure; +, neurons after NGF exposure; Ab, neurons exposed to Abeta 1–42.

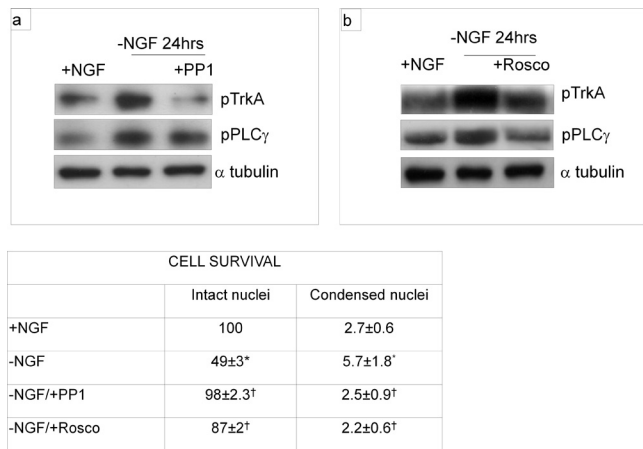

**Fig. S4.** Cell survival analysis of neurons (evaluated as intact and condensed nuclei) exposed to the Src family inhibitor PP1 (1  $\mu$ M) and the CDK inhibitor roscovitine (20  $\mu$ M) after 24 h of NGF removal (Table). Values are the mean  $\pm$  SE of triplicate determinations of 5 independent experiments and are expressed as percentage of control cells (+NGF). \* $P < 0.05$  vs. +NGF; † $P < 0.05$  vs. -NGF samples. (a and b) pTrkA and pPLC $\gamma$  Western blot analyses of the corresponding samples.

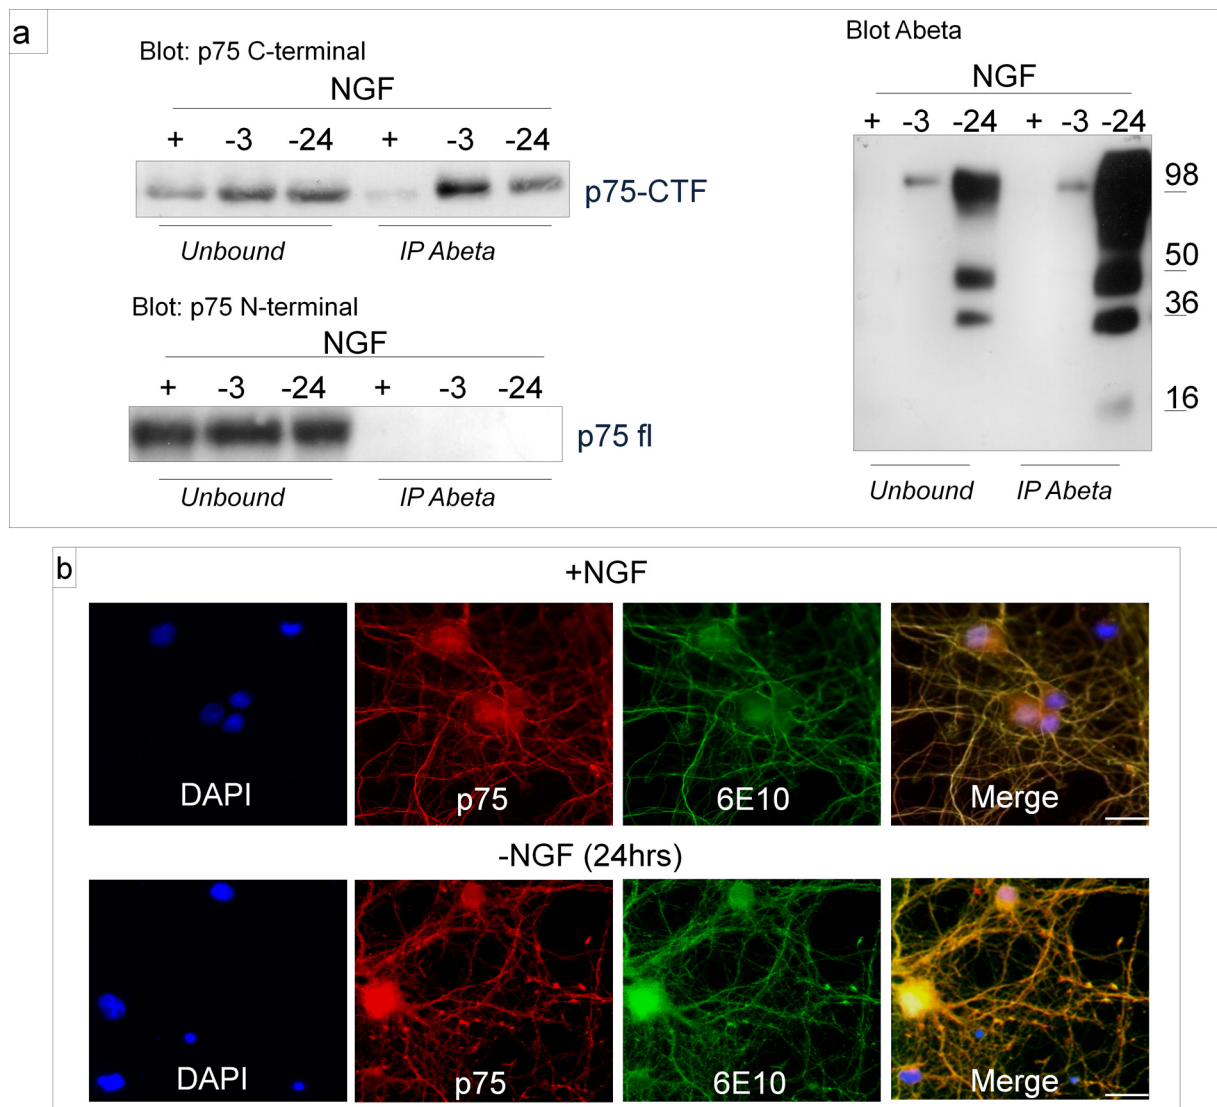

+NGF

DAPI      p75      6E10      Merge

-NGF (24hrs)

DAPI      p75      6E10      Merge

**Fig. S5.** (a) Immunoprecipitation analysis performed with anti-Abeta (see *Methods*) and blotted with p75 C-terminal antibodies (see *Methods*) from control samples (+NGF) and deprived of NGF for 3 h and 24 h (*Left*). The same samples loaded in equal amounts and run on a different gel were analyzed for Abeta antibody (Mab 6E10), confirming the binding between  $\beta$ -amyloid peptides and p75 (*Right*). Membranes, after stripping, were reblotted with p75 N-terminal antibody (*Bottom*) as control of loading gel. (b) Double-immunofluorescence performed with anti-p75 C-terminal (p75, red) and anti-Abeta antibodies (6E10, green) in the presence of NGF (+NGF) and after 24 h of NGF removal [-NGF (24hrs)]. Nuclei are stained with DAPI (blue). The corresponding merges are shown in the right-most panels. (Scale bar, 25  $\mu$ m.)

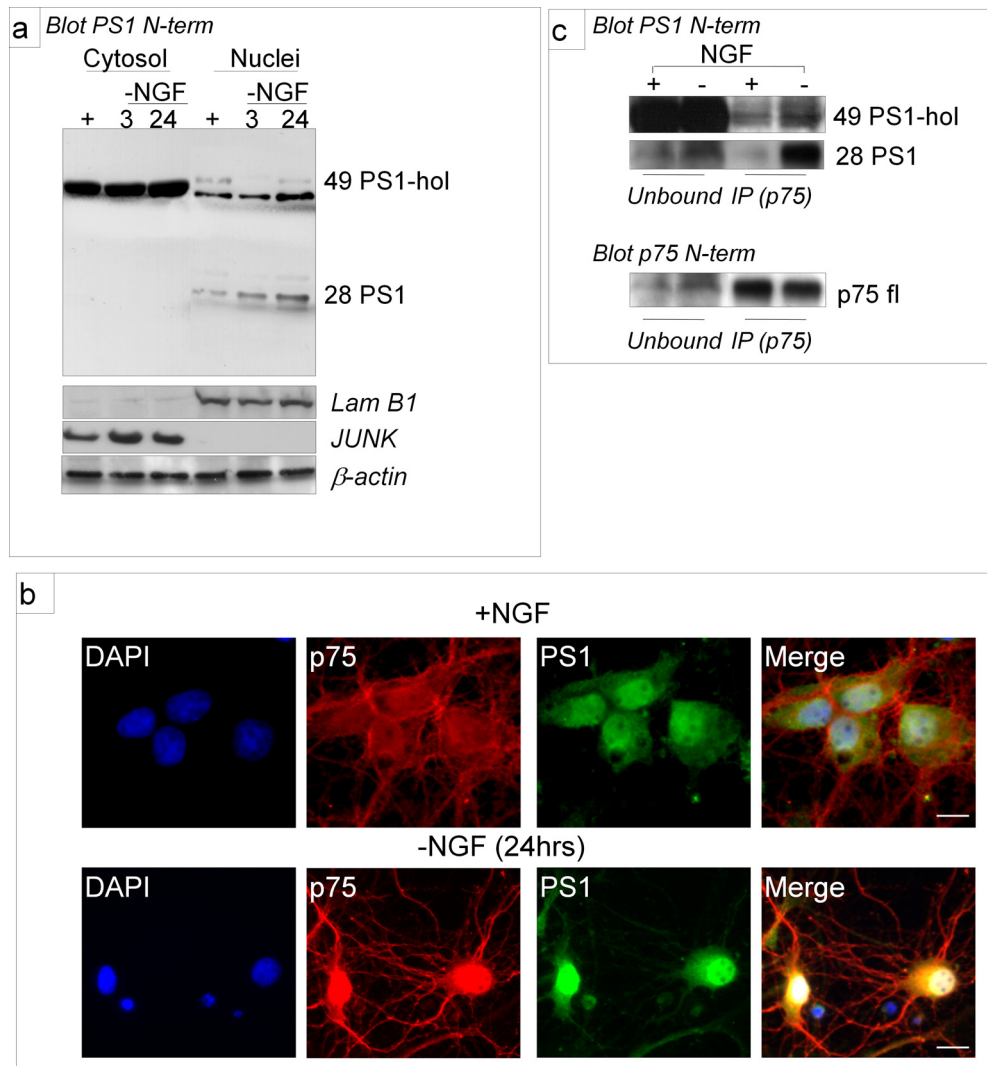

**Fig. S6.** (a) Western blot analysis of PS1 N-terminal fragments in cytosolic and nuclear fraction from samples deprived of NGF for 3 h and 24 h. PS1 hol, PS1 holoprotein (49 kDa); 28 PS1, 28-kDa PS1 N-terminus fragment. The same extracts were analyzed for JUNK and Lamin B1 (Lam B1) protein expression to determine the purity of cytosol and nuclei. Beta-actin level is shown as loading control. (b) Double-immunofluorescence performed with anti-p75 C-terminal (p75, red) and anti-PS1 N-terminus (green) in the presence of NGF (+NGF) and after 24 h of NGF removal [-NGF (24 hrs)]. Nuclei are stained with DAPI (blue). The corresponding merges are reported in the right-most panels. (Scale bar, 13  $\mu$ m.) (c) Immunoprecipitation analysis performed with anti-p75 C-terminal (see *Methods*) from control samples and after 24 h of NGF deprivation. Immunocomplexes were analyzed by immunoblotting with PS1 N-terminus antibody. At short Western blot exposure time (*Bottom*), only the 28-kDa PS1 band is present in p75 C-terminal immunoprecipitated fraction after 24 h of NGF deprivation, but longer exposure time also allows detection of the holoprotein PS1 band (*Top*). The amount of p75 brought down by the immunoprecipitation procedure was analyzed, after stripping, by blotting with p75 N-terminal antibody.

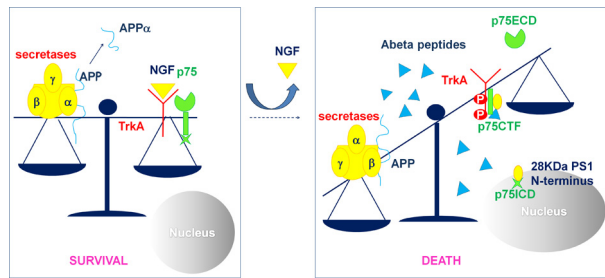

**Fig. S7.** After NGF removal an “imbalance” in NGF receptor and the APP processing systems occurs. When NGF is present and bound to TrkA, the amyloidogenic pathway is kept under control (*Left*). After NGF removal (*Right*) the balance is shifted to the amyloidogenic pathway with an unexpected TrkA phosphorylation and APP/p75 processing, to produce Abeta and p75 CTF/ICD fragments. CTF accumulates into the cytoplasm, where it associates with TrkA, Abeta peptides, and PS1 protein, whereas ICD is mainly found in the nuclear compartment, where 28-kDa PS1 N-terminus fragment is also present.

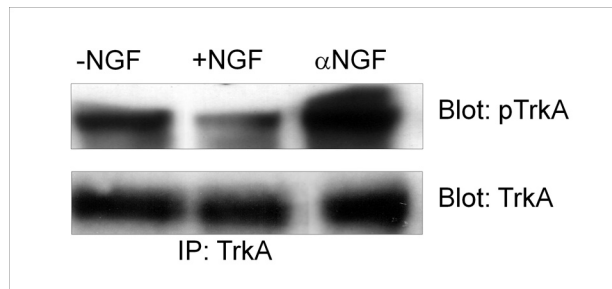

**Fig. S8.** Western blot analysis performed in hippocampal neurons exposed (+NGF) or deprived of NGF by simple withdrawal (-NGF) or by NGF antibody incubation ( $\alpha$ NGF) for 24 h. Samples were immunoprecipitated with a specific anti-TrkA and immunoblotted with TrkA(pY490) antibody. The figure is representative of 3 independent experiments.
